# Supplementary material
Source: PubMed Central journal article supplement (PMC4674258)
Supplement: SD8.pdf [file SD8.pdf]

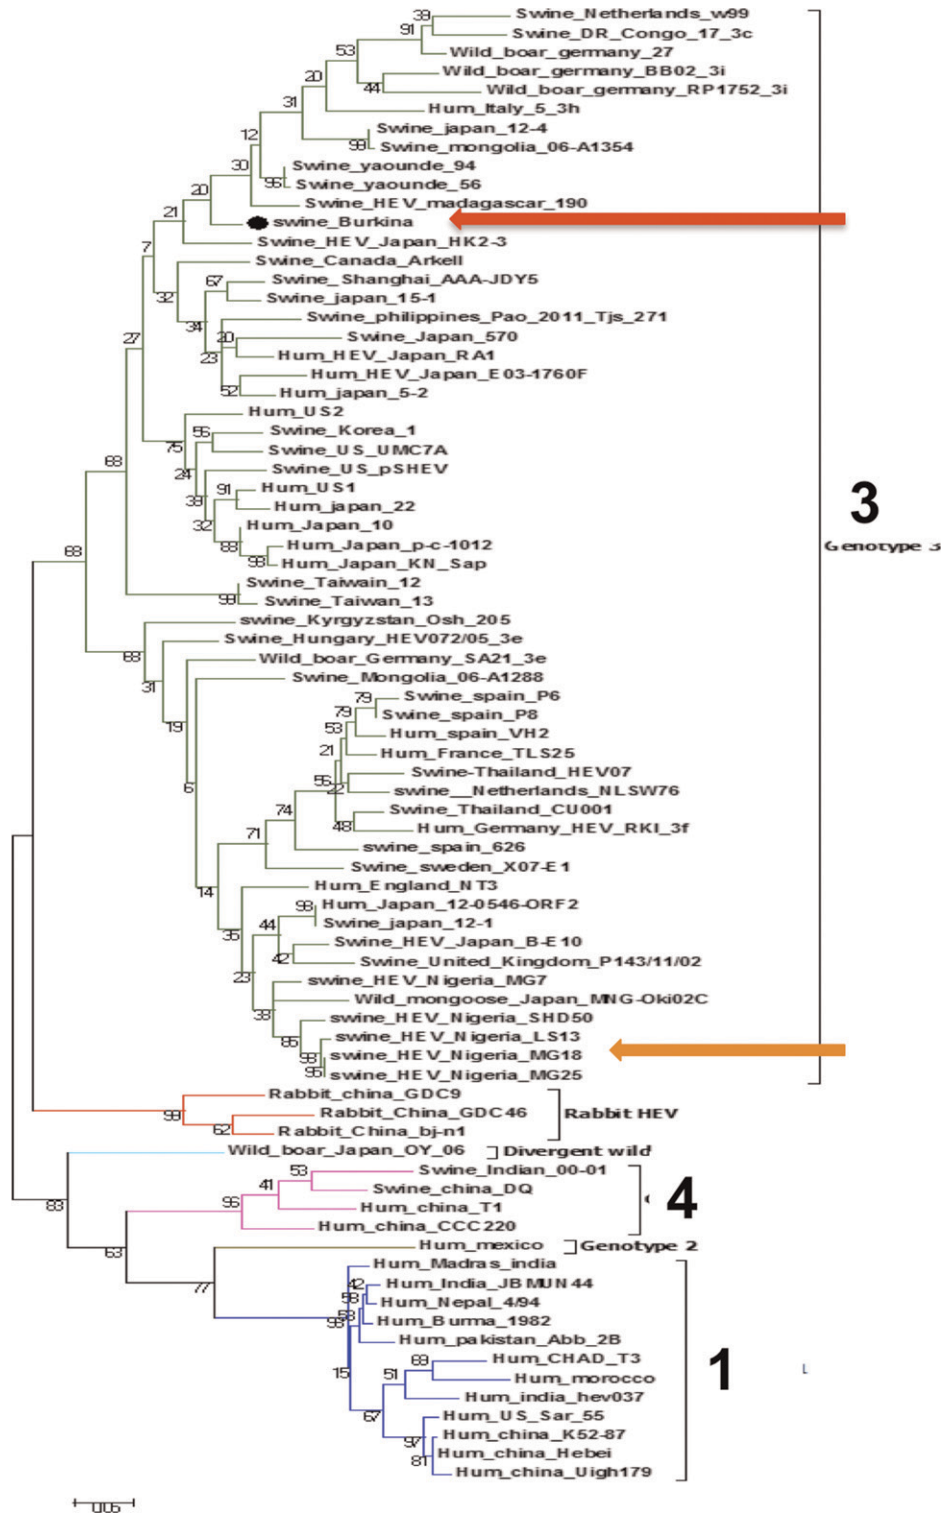

SUPPLEMENTAL FIGURE 1. Phylogenetic analysis of 341-bp sequence from hepatitis E virus open reading frame 2 (HEV-ORF2) obtained from Burkinabe swine (swine Burkina AC#LN831924; indicated by a dot and large arrow) aligned with 78 reference sequences retrieved from Genbank. Nigerian HEV strains identified from swine in another west African region are indicated by a small arrow. Maximum-likelihood method based on the Tamura-Nei model was used. The tree with the highest log likelihood (-5,661.97) is shown. The percentage of trees in which the associated taxa clustered together as assessed by bootstrap method (100 replicates) is shown next to the branches. Branch lengths scale is the number of substitutions per site. Sequence name, given as species-HEV-country-strain-name, and accession number are given in Supplemental Table 1. All positions containing gaps and missing data were eliminated, leaving 276 positions in the final dataset. Evolutionary analyses were conducted in MEGA6 software.<sup>16</sup>

SUPPLEMENTAL TABLE 1

Reference sequences used in the phylogenetic analysis to genotype the Burkinabe HEV-swine sequence

| Accession number | Name                               | Genotype       | Date Genbank |
|------------------|------------------------------------|----------------|--------------|
| AY575859         | Swine_US_pSHEV                     | Genotype 3     | 2005         |
| AF060669         | Hum_US2                            | Genotype 3     | 1999         |
| AF060668         | Hum_US1                            | Genotype 3     | 1995         |
| AB683185         | Hum_Japan_p-c-1012                 | Genotype 3     | 2013         |
| AB074918         | Hum_Japan_KN_Sap                   | Genotype 3     | 2008         |
| AB089824         | Hum_Japan_10                       | Genotype 3     | 2009         |
| AY115488         | Swine_Canada_Arkeil                | Genotype 3     | 2002         |
| AB073912         | Swine_Japan_570                    | Genotype 3     | 2009         |
| AP003430         | Hum_HEV_Japan_RA1                  | Genotype 3     | 2008         |
| AJ272108         | Hum_china_T1                       | Genotype 4     | 2000         |
| AB108537         | Hum_china_CCC220                   | Genotype 4     | 2008         |
| M74506           | Hum_mexico                         | Genotype 2     | 1993         |
| AY204877         | Hum_CHAD_T3                        | Genotype 1     | 2003         |
| AY230202         | Hum_morocco                        | Genotype 1     | 2003         |
| L25595           | Hum_china_K52-87                   | Genotype 1     | 1995         |
| M80581           | Hum_US_Sar_55                      | Genotype 1     | 1993         |
| M94177           | Hum_china_Hebei                    | Genotype 1     | 1996         |
| D11093           | Hum_china_Uigh179                  | Genotype 1     | 1999         |
| X98292           | Hum_india_hev037                   | Genotype 1     | 1998         |
| AF185822         | Hum_pakistan_Abb_2B                | Genotype 1     | 2001         |
| M73218           | Hum_Burma_1982                     | Genotype 1     | 2000         |
| KM248374         | Hum_India_JBMUN44                  | Genotype 1     | 2014         |
| AF020607         | Hum_Nepal_4/94                     | Genotype 1     | 2001         |
| X99441           | Hum_Madras_india                   | Genotype 1     | 1997         |
| KJ645957         | Swine_philippines_Pao_2011_Tjs_271 | Genotype 3     | 2015         |
| AB236320         | Wild_mongoose_Japan_MNG-Ok102C     | Genotype 3     | 2009         |
| AB824697         | Hum_Japan_12-0546-ORF2             | Genotype 3     | 2014         |
| AB248522         | Swine_japan_12-4                   | Genotype 3     | 2009         |
| AB290312         | Swine_Mongolia_06-A1288            | Genotype 3     | 2009         |
| AB301710         | Hum_HEV_Japan_E03-1760F            | Genotype 3     | 2008         |
| AB481226         | Swine_HEV_Japan_B-E10              | Genotype 3     | 2011         |
| AB602441         | Wild_boar_Japan_OY_06              | Divergent wild | 2011         |
| AY723745         | Swine_Indian_00-01                 | Genotype 4     | 2006         |
| DQ279091         | Swine_china_DQ                     | Genotype 4     | 2007         |
| EU360977-        | Swine_sweden_X07-E1                | Genotype 3     | 2008         |
| EU375463         | Swine-Thailand_HEV07               | Genotype 3     | 2009         |
| EU495148         | Hum_France_TLS25                   | Genotype 3     | 2009         |
| EU723512         | swine_spain_626                    | Genotype 3     | 2009         |
| EU723514         | Swine_spain_P6                     | Genotype 3     | 2009         |
| EU723516         | Swine_spain_P8                     | Genotype 3     | 2009         |
| FJ426403         | Swine_Korea_1                      | Genotype 3     | 2010         |
| FJ527832         | Swine_Shanghai_AAA-JDY5            | Genotype 3     | 2009         |
| FJ653660         | Swine_Thailand_CU001               | Genotype 3     | 2010         |
| FJ705359         | Wild_boar_germany_27               | Genotype 3     | 2009         |
| FJ906895         | Rabbit_china_GDC9                  | Rabbit HEV     | 2009         |
| FJ906896         | Rabbit_China_GDC46                 | Rabbit HEV     | 2009         |
| FJ956757         | Hum_Germany_HEV_RKI_3f             | Genotype 3f    | 2009         |
| FJ998008         | Wild_boar_germany_BB02_3i          | Genotype 3i    | 2009         |
| FJ998015         | Wild_boar_Germany_SA21_3e          | Genotype 3e    | 2009         |
| GU937805         | Rabbit_China_bj-n1                 | Rabbit HEV     | 2011         |
| HM055578         | Swine_Hungary_HEV072/05_3e         | Genotype 3e    | 2011         |
| KC012635         | Swine_yaounde_94                   | Genotype 3     | 2013         |
| JX507130         | Swine_HEV_madagascar_190           | Genotype 3     | 2013         |
| KC012634         | Swine_yaounde_56                   | Genotype 3     | 2013         |
| AB194479         | Swine_HEV_Japan_HK2-3              | Genotype 3     | 2009         |
| AB082561         | Hum_japan_5-2                      | Genotype 3     | 2009         |
| AB094250         | Swine_japan_12-1                   | Genotype 3     | 2009         |
| AB094256         | Swine_japan_15-1                   | Genotype 3     | 2009         |
| AB115543         | Hum_japan_22                       | Genotype 3     | 2009         |
| AB290105         | Swine_mongolia_06-A1354            | Genotype 3     | 2008         |
| AF195062         | Hum_spain_VH2                      | Genotype 3     | 2000         |
| AF296165         | Swine_Taiwain_12                   | Genotype 3     | 2001         |
| AF296166         | Swine_Taiwan_13                    | Genotype 3     | 2001         |
| AF336297         | Swine_Netherlands_w99              | Genotype 3     | 2002         |

(continued)

SUPPLEMENTAL TABLE 1

Continued

| Accession number | Name                            | Genotype    | Date Genbank |
|------------------|---------------------------------|-------------|--------------|
| AF455784         | swine_Kyrgyzstan_Osh_205        | Genotype 3  | 2004         |
| AF466667         | Swine_US_UMC7A                  | Genotype 3  | 2002         |
| AF503512         | Swine_United_Kingdom_P143/11/02 | Genotype 3  | 2006         |
| AJ879569         | Hum_England_NT3                 | Genotype 3  | 2005         |
| AY032757         | swine_Netherlands_NLSW76        | Genotype 3  | 2002         |
| FJ600536         | Swine_DR_Congo_17_3c            | Genotype 3c | 2010         |
| FJ998012         | Wild_boar_germany_RP1752_3i     | Genotype 3i | 2009         |
| HM446630         | Hum_Italy_5_3h                  | Genotype 3h | 2011         |
